# Supplementary material for: Formation of iron(iii)–thiolate metallocyclophane using a ferrocene-based bis-isocyanide
Source: Royal Society of Chemistry journal article supplement (doi:10.1039/d0nj03967e), 2020-01-01
Supplement: d0nj03967e1.pdf [file d0nj03967e1.pdf]

Supporting Information for New Journal of Chemistry

Formation of Iron(III)-Thiolate Metallocyclophane Using a Ferrocene-Based Bis-Isocyanide

Yen-Chung Huang<sup>1</sup>, Wan-Yu Lan<sup>1</sup>, Wei-Min Ching<sup>2</sup>, Sodio C. N. Hsu<sup>1,3,4\*</sup>

<sup>1</sup>*Department of Medicinal and Applied Chemistry, Kaohsiung Medical University, Kaohsiung 807, Taiwan*

<sup>2</sup>*Department of Chemistry, University of Minnesota, Minneapolis, Minnesota 55455, United States*

<sup>3</sup>*Department of Chemistry, National Sun Yat-Sen University, Kaohsiung 804, Taiwan*

<sup>4</sup>*Department of Medical Research, Kaohsiung Medical University Hospital, Kaohsiung 807, Taiwan*

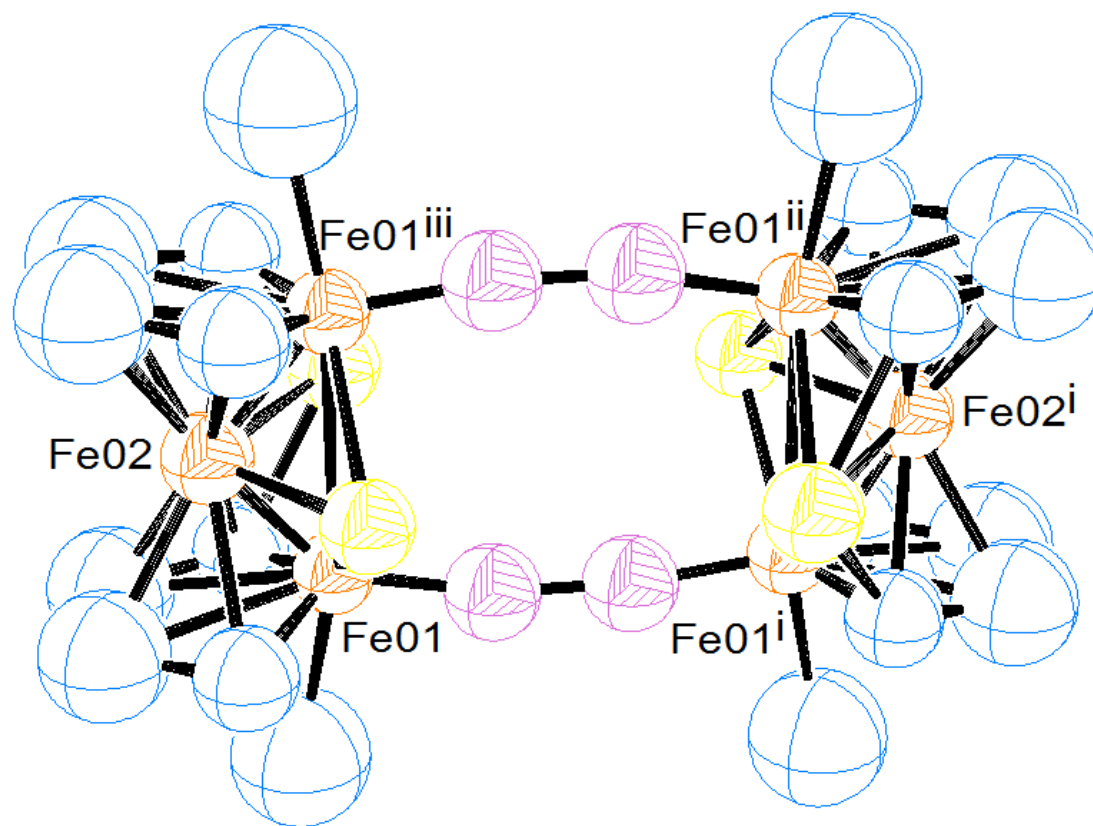

**Figure S1.** ORTEP representation of the crystal structure of the cation of  $3[\text{BF}_4]_2$  which exist highly disorder due to the positional packing of Cp-Fe fragments, ferrocene moiety, and iron-thiolate core. (50% ellipsoid; all H atoms and anions are omitted for clarity).

---

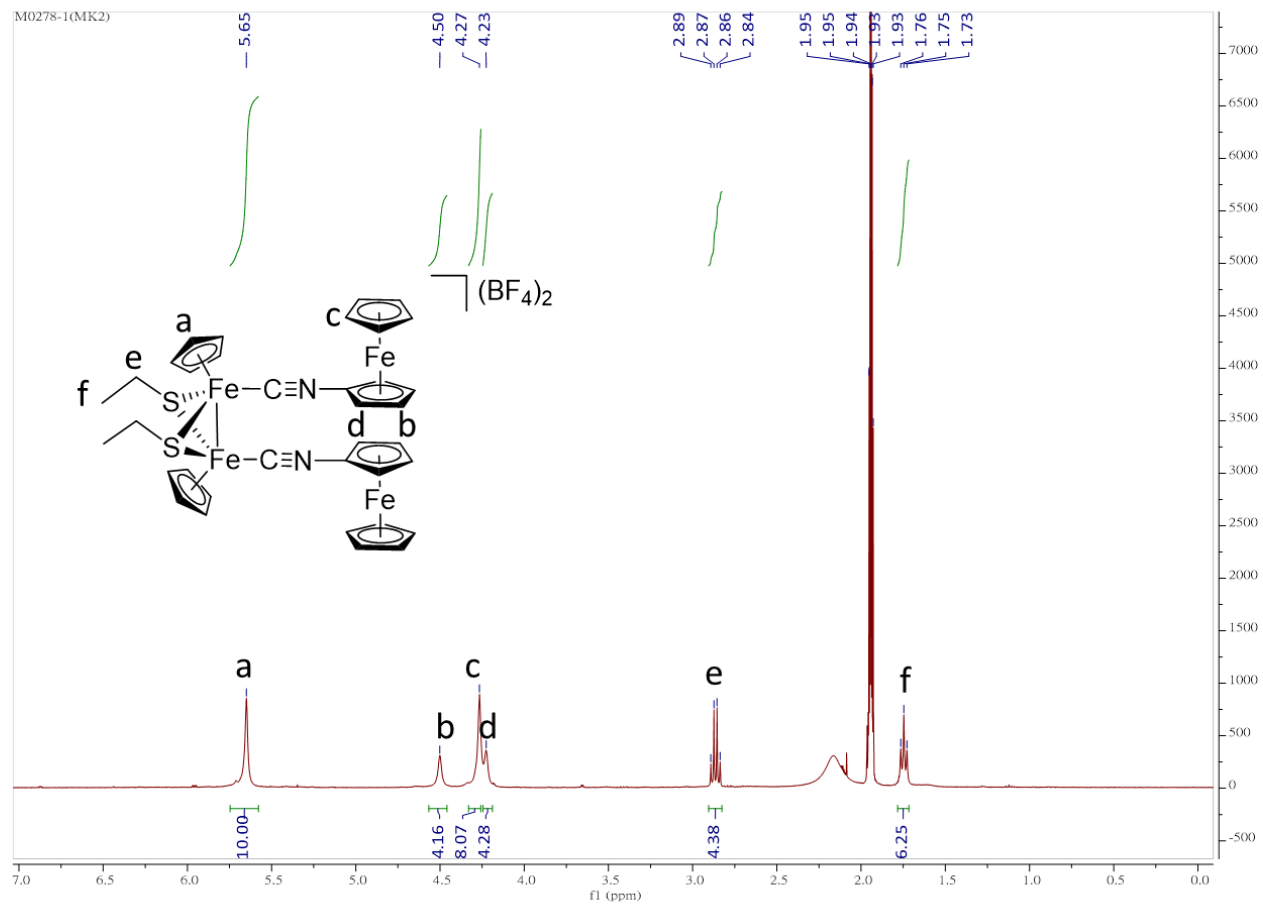

**Figure S2.**  $^1\text{H}$  NMR spectrum of  $2[\text{BF}_4]_2$  in  $\text{CD}_3\text{CN}$ .

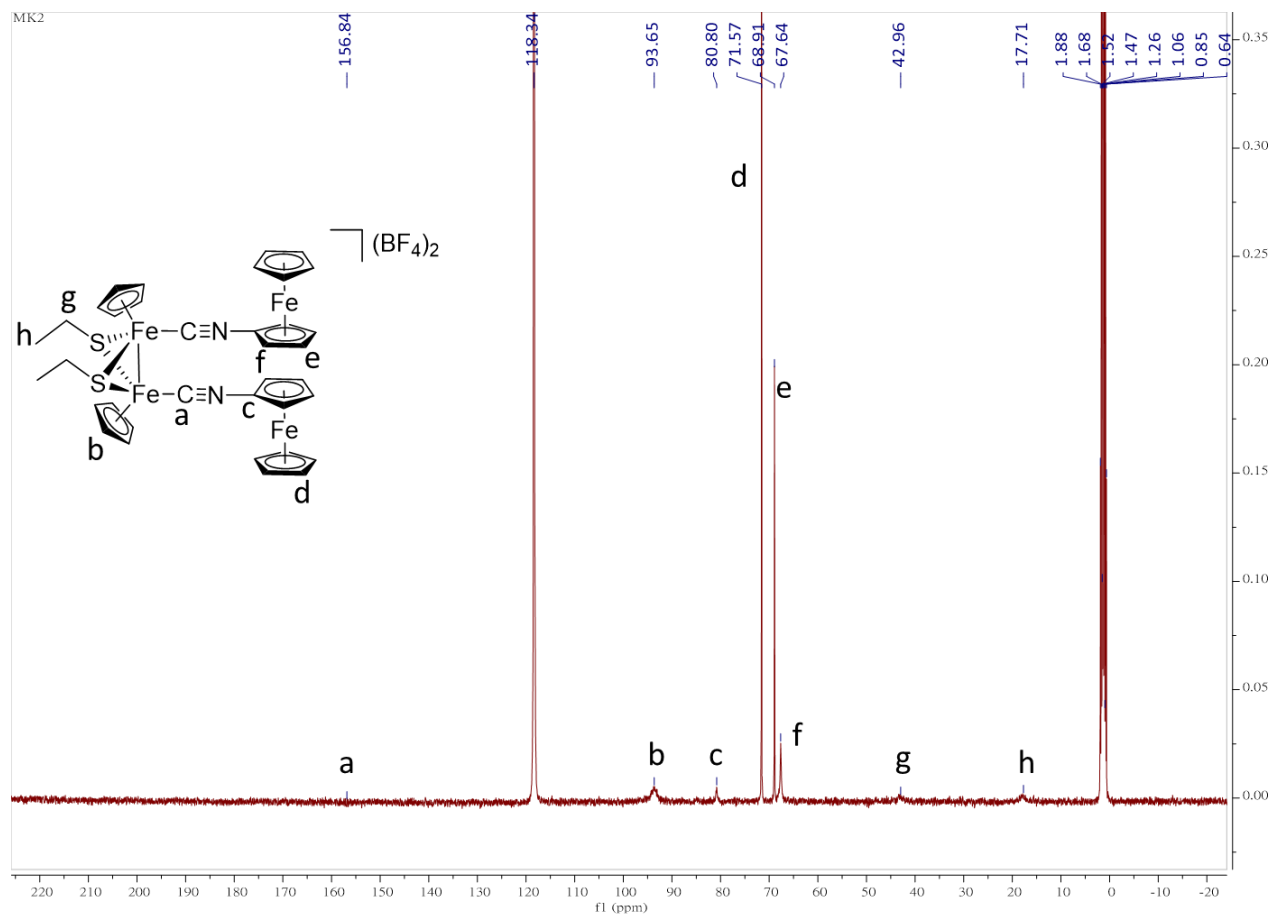

**Figure S3.**  $^{13}C\{^1H\}$  NMR spectrum of **2** $[BF_4]_2$  in  $CD_3CN$ .

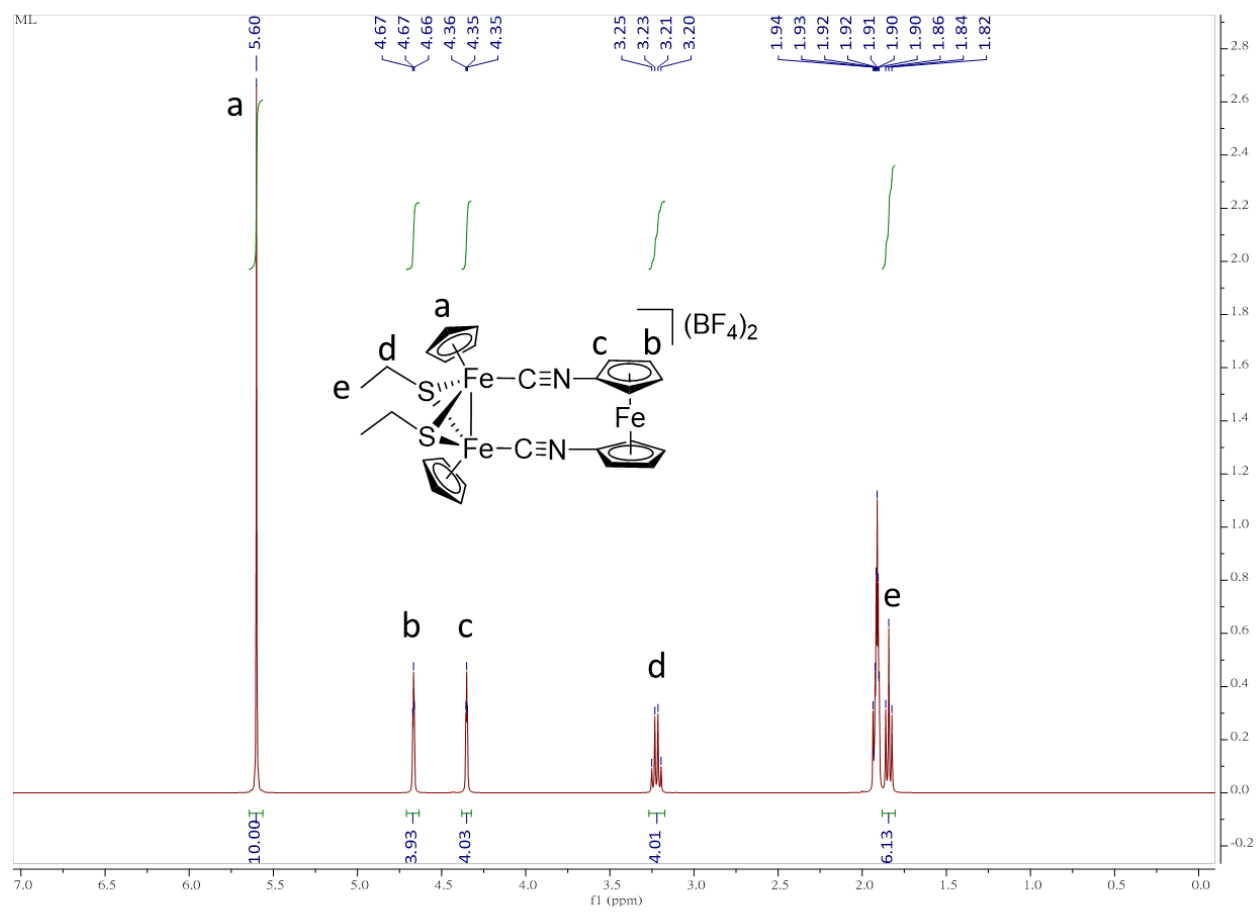

**Figure S4.**  $^1\text{H}$  NMR spectrum of  $3[\text{BF}_4]_2$  in  $\text{CD}_3\text{CN}$ .

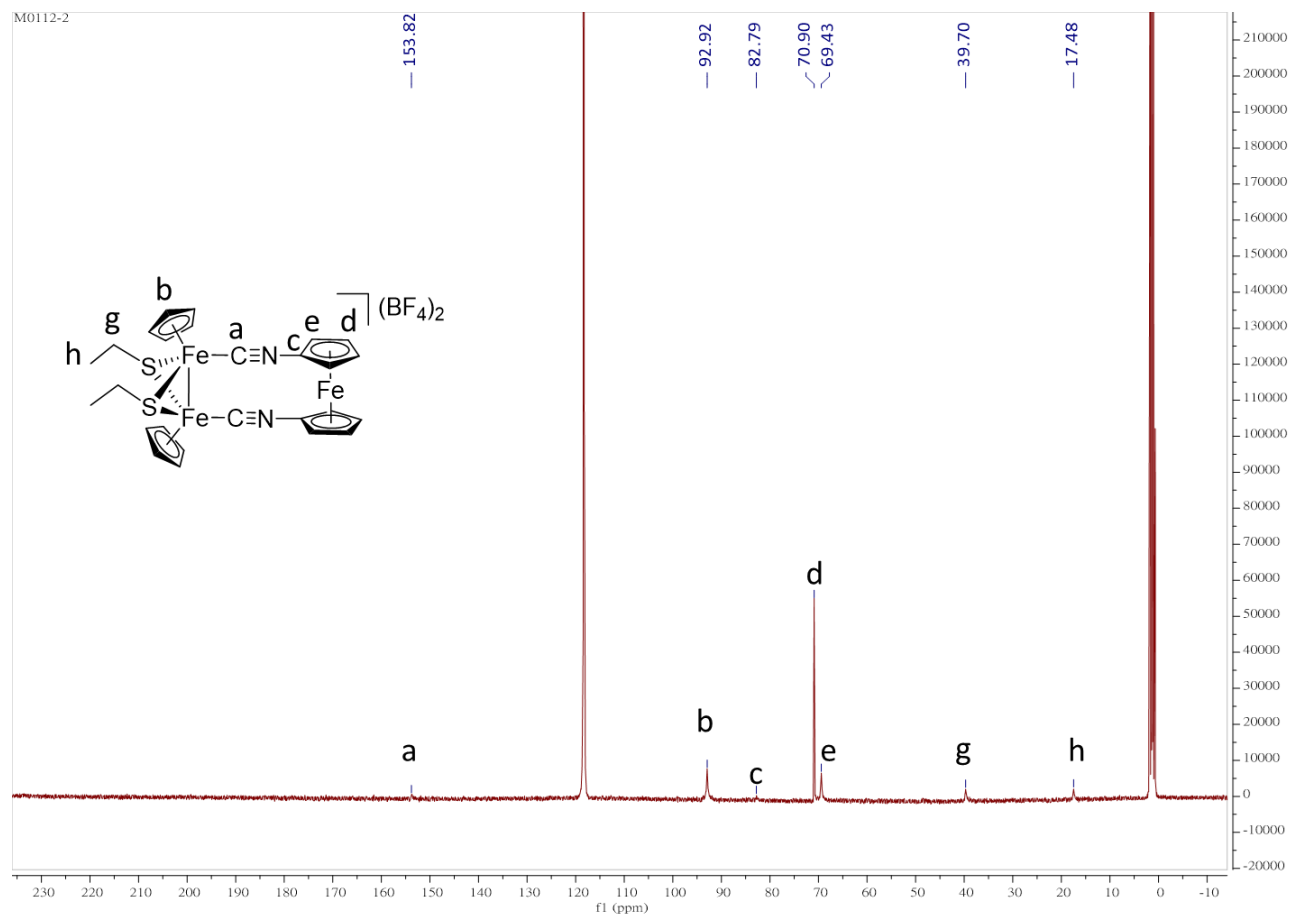

**Figure S5.**  $^{13}\text{C}\{^1\text{H}\}$  NMR spectrum of  $\mathbf{3}[\text{BF}_4]_2$  in  $\text{CD}_3\text{CN}$ .

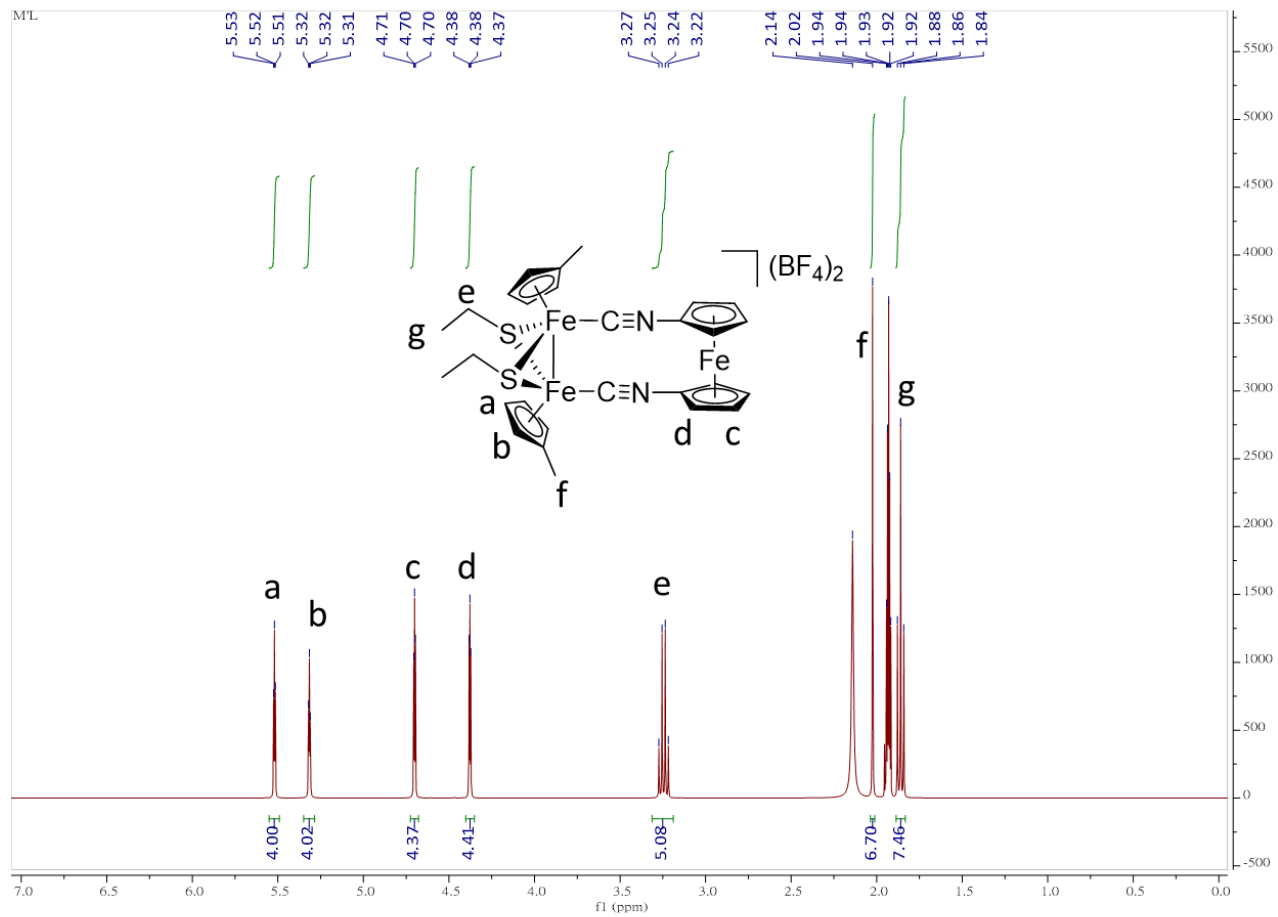

**Figure S6.**  $^1\text{H}$  NMR spectrum of  $\mathbf{3}'[\text{BF}_4]_2$  in  $\text{CD}_3\text{CN}$ .

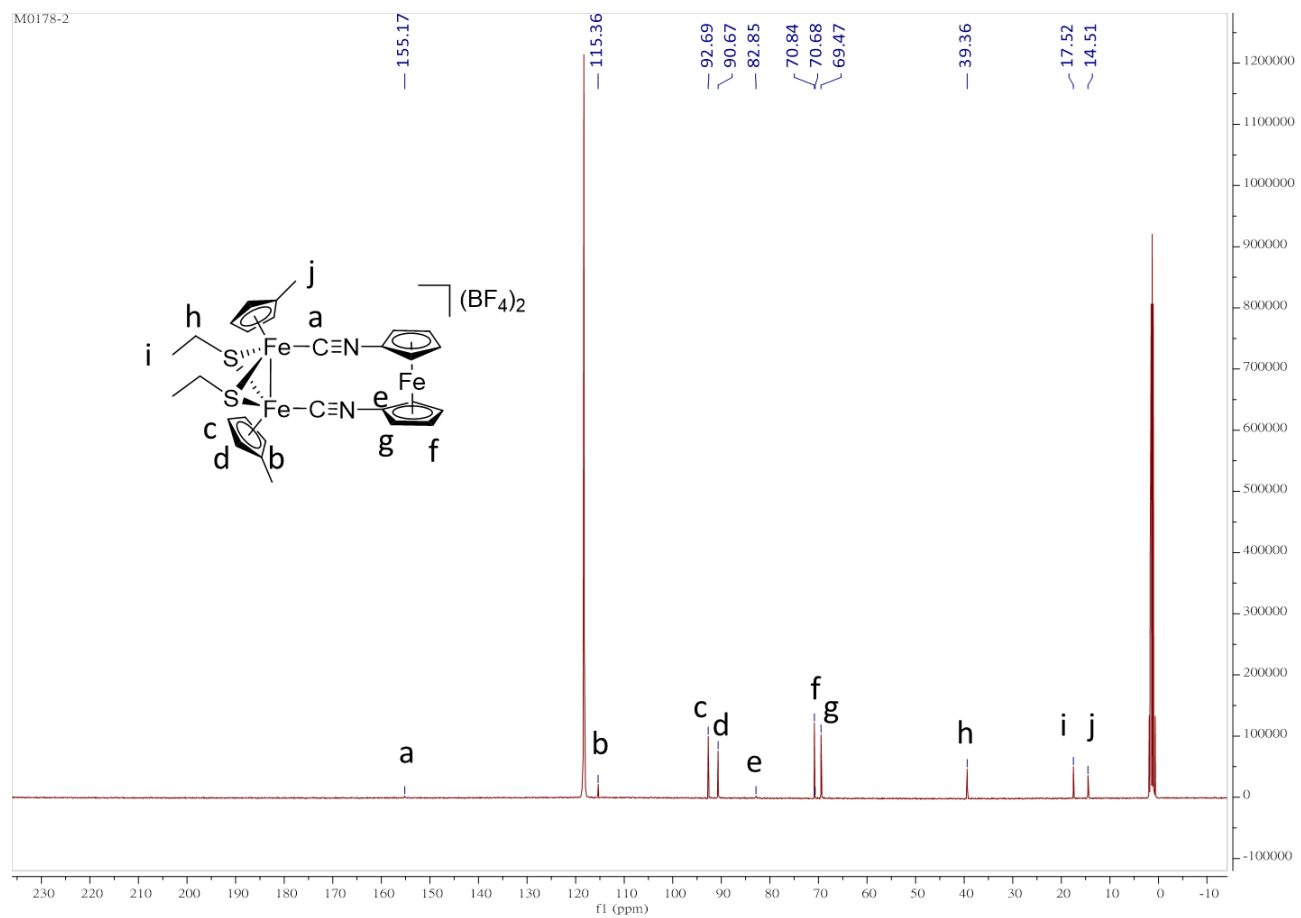

**Figure S7.**  $^{13}\text{C}\{^1\text{H}\}$  NMR spectrum of  $3'[\text{BF}_4]_2$  in  $\text{CD}_3\text{CN}$ .



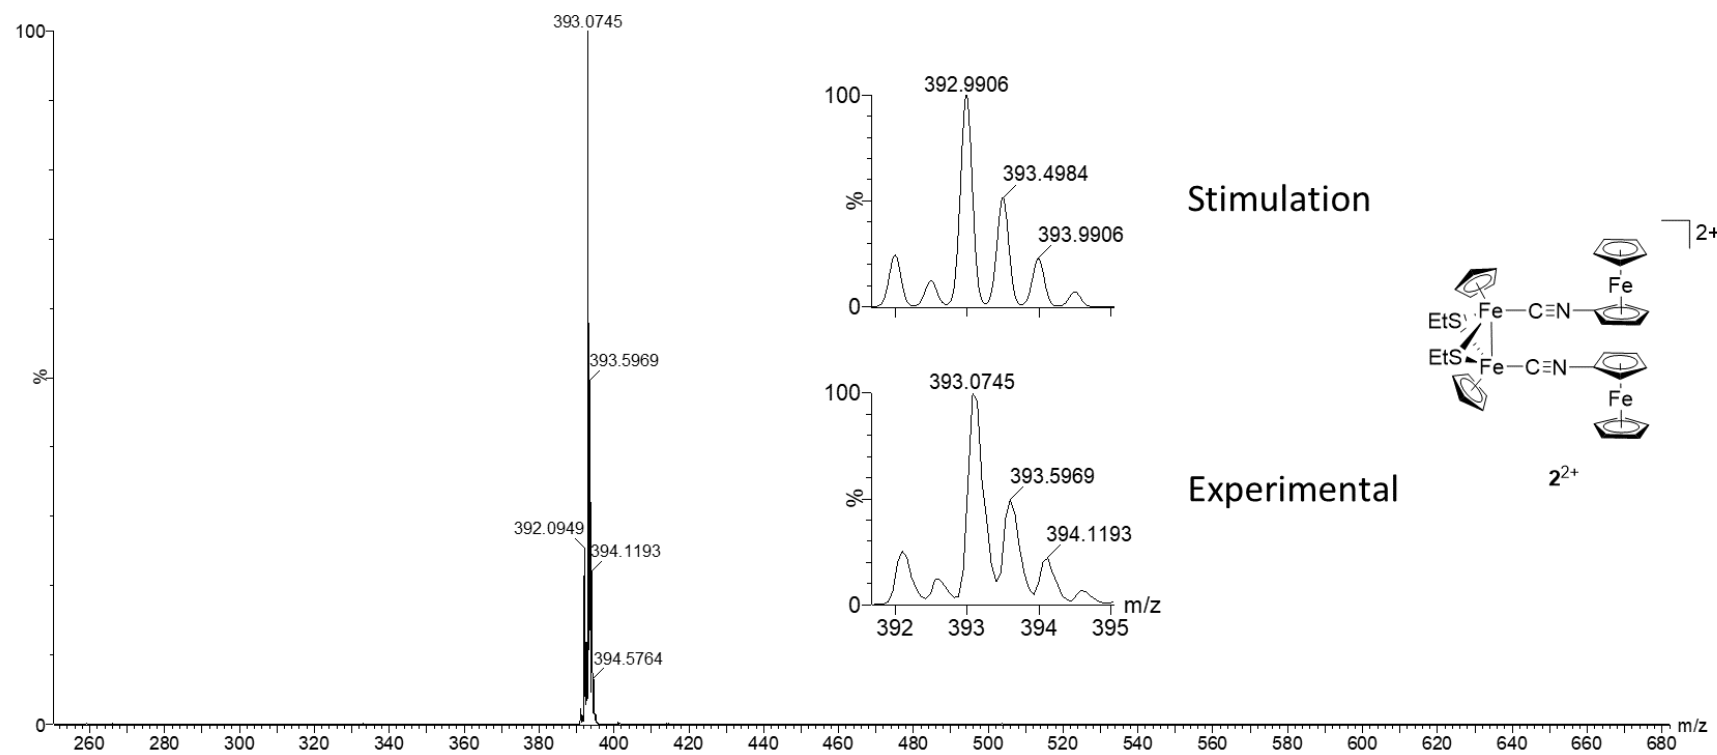

**Figure S8.** ESI-MS of  $2[\text{BF}_4]_2$  in  $\text{CH}_3\text{CN}$ .

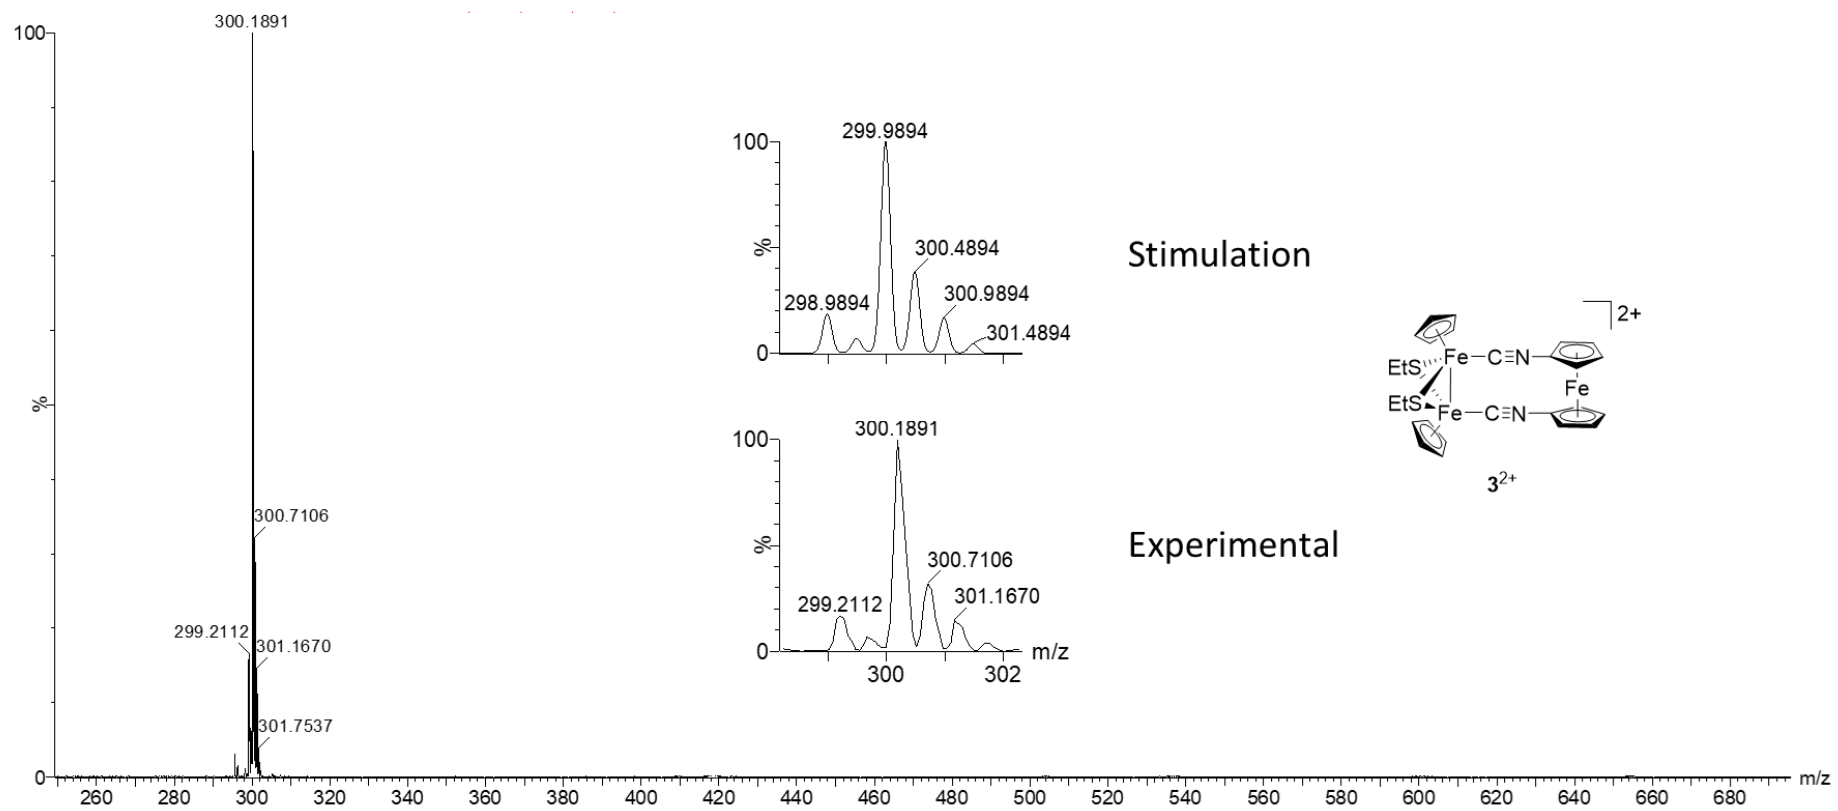

**Figure S9.** ESI-MS of **3**[BF<sub>4</sub>]<sub>2</sub> in CH<sub>3</sub>CN.

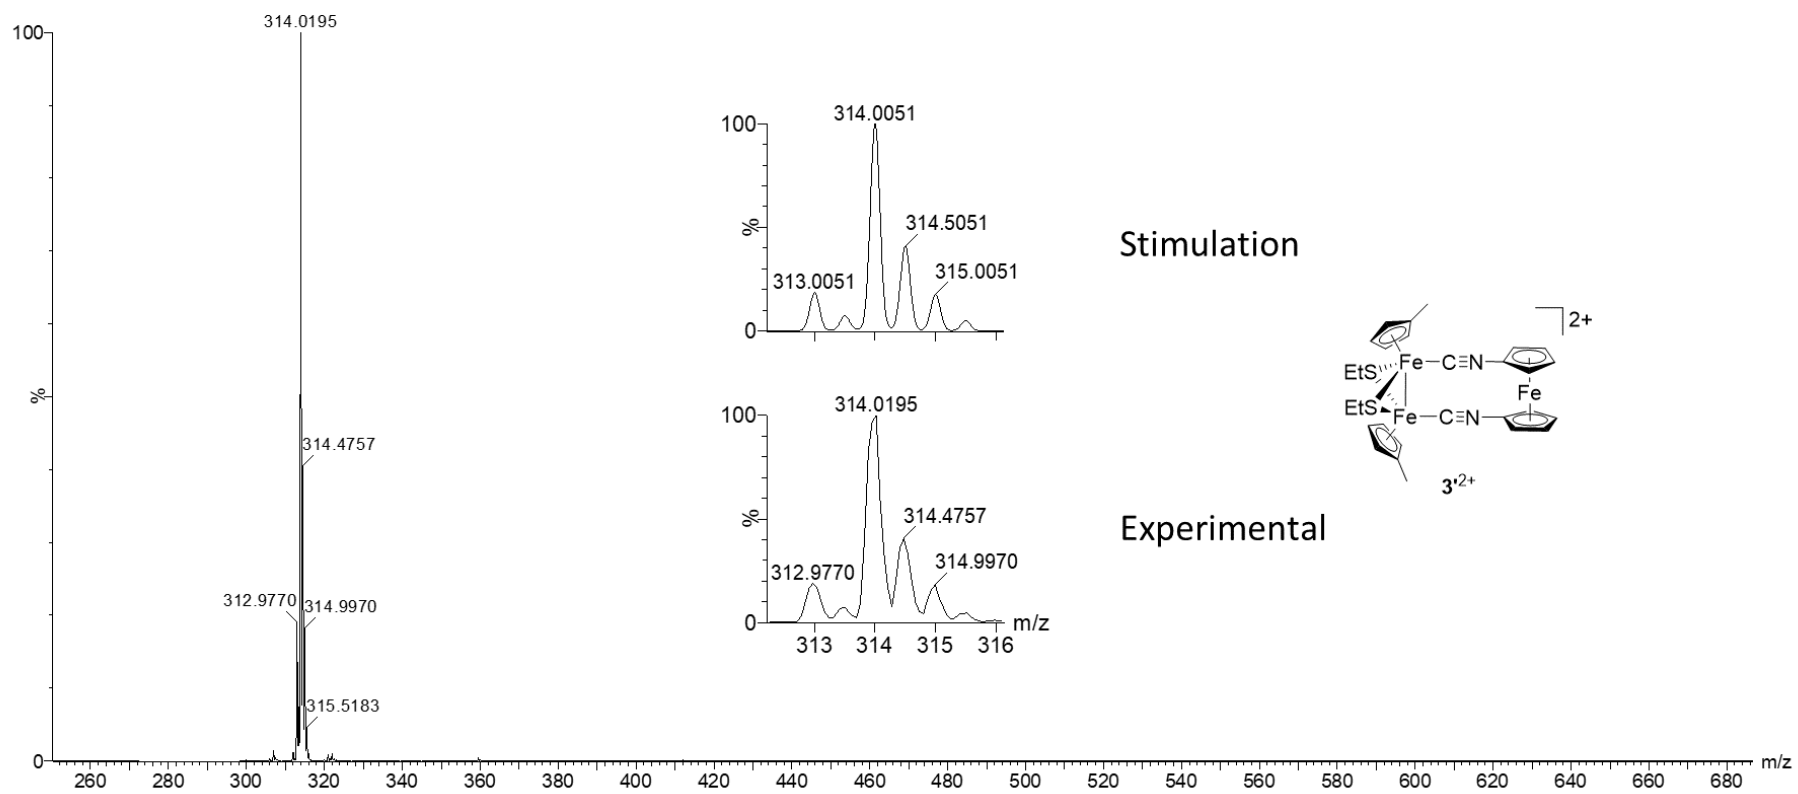

**Figure S10.** ESI-MS of  $3'[\text{BF}_4]_2$  in  $\text{CH}_3\text{CN}$ .

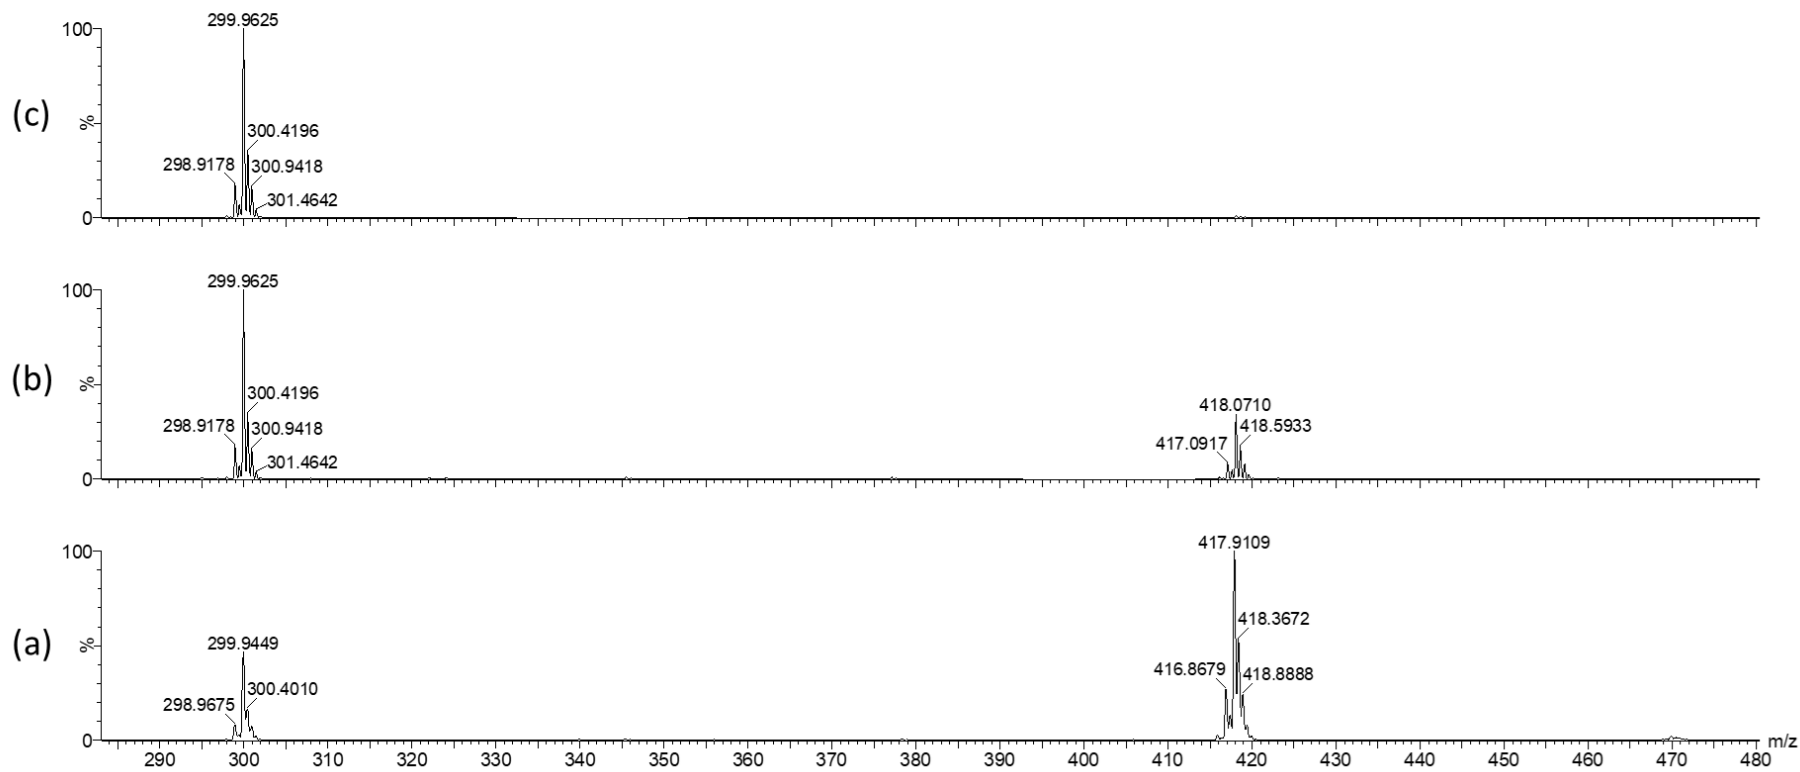

**Figure S11.** Reaction tracing ESI-MS of  $4[BF_4]_2$  which mixed  $1[BF_4]_2$  with excess  $(CN)_2$ -Fc for (a) 10 min, (b) 2 hrs, and (c) 6 hrs in  $CH_3CN$ .

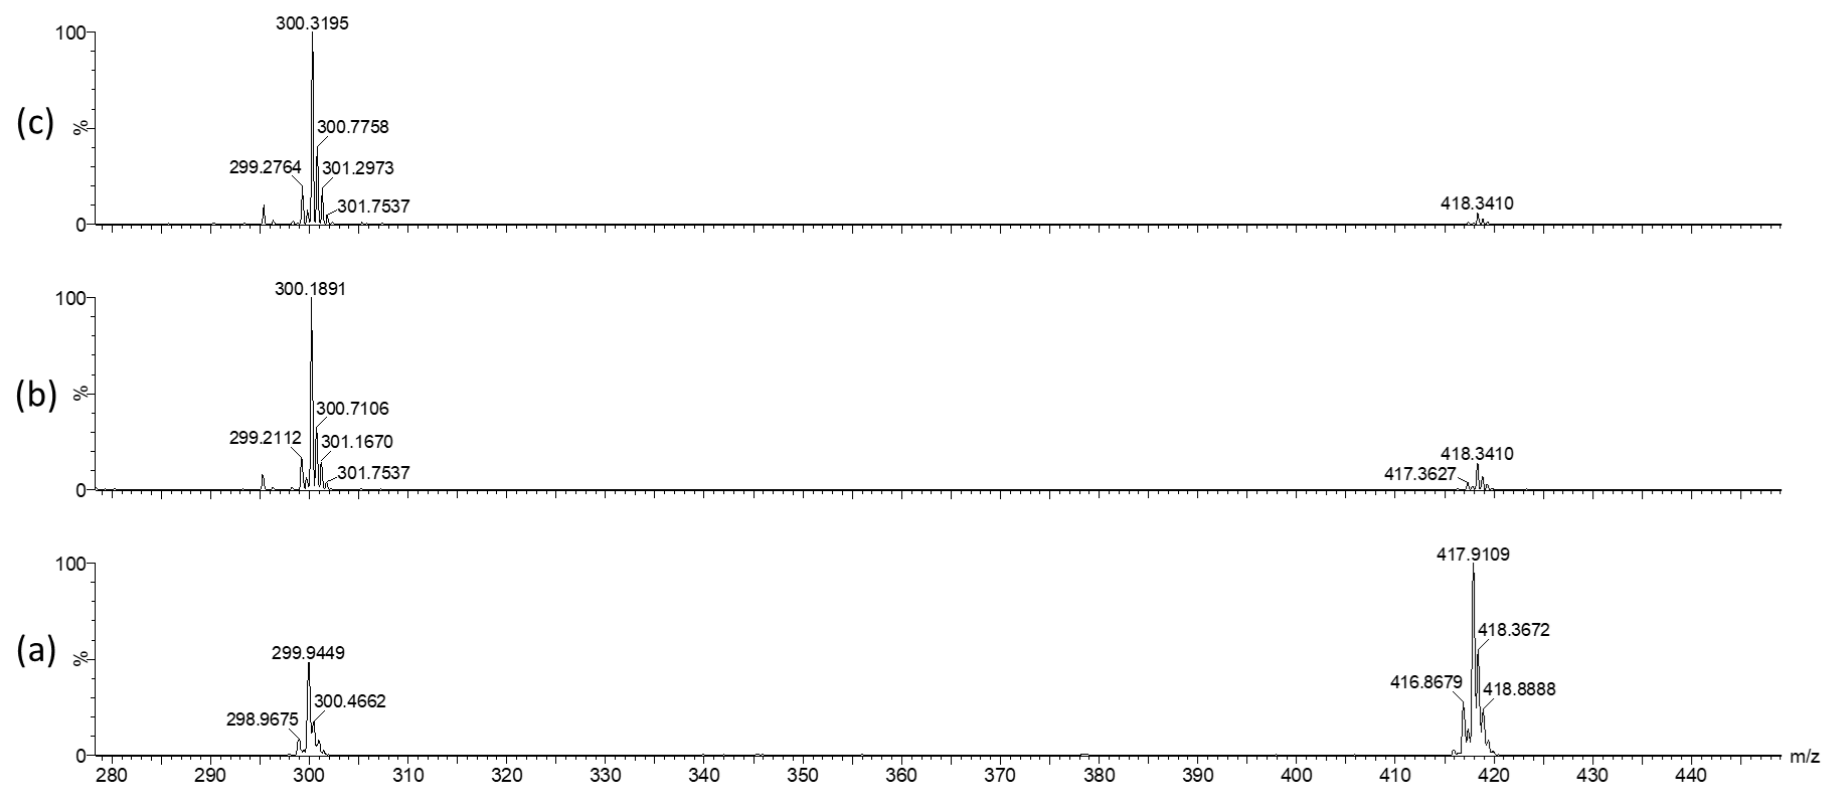

**Figure S12.** ESI-MS of  $4[BF_4]_2$  for (a) fresh prepared, (b) 45 min, and (c) fresh prepared added 1eq of  $1[BF_4]_2$  for 30 min in  $CH_3CN$ .

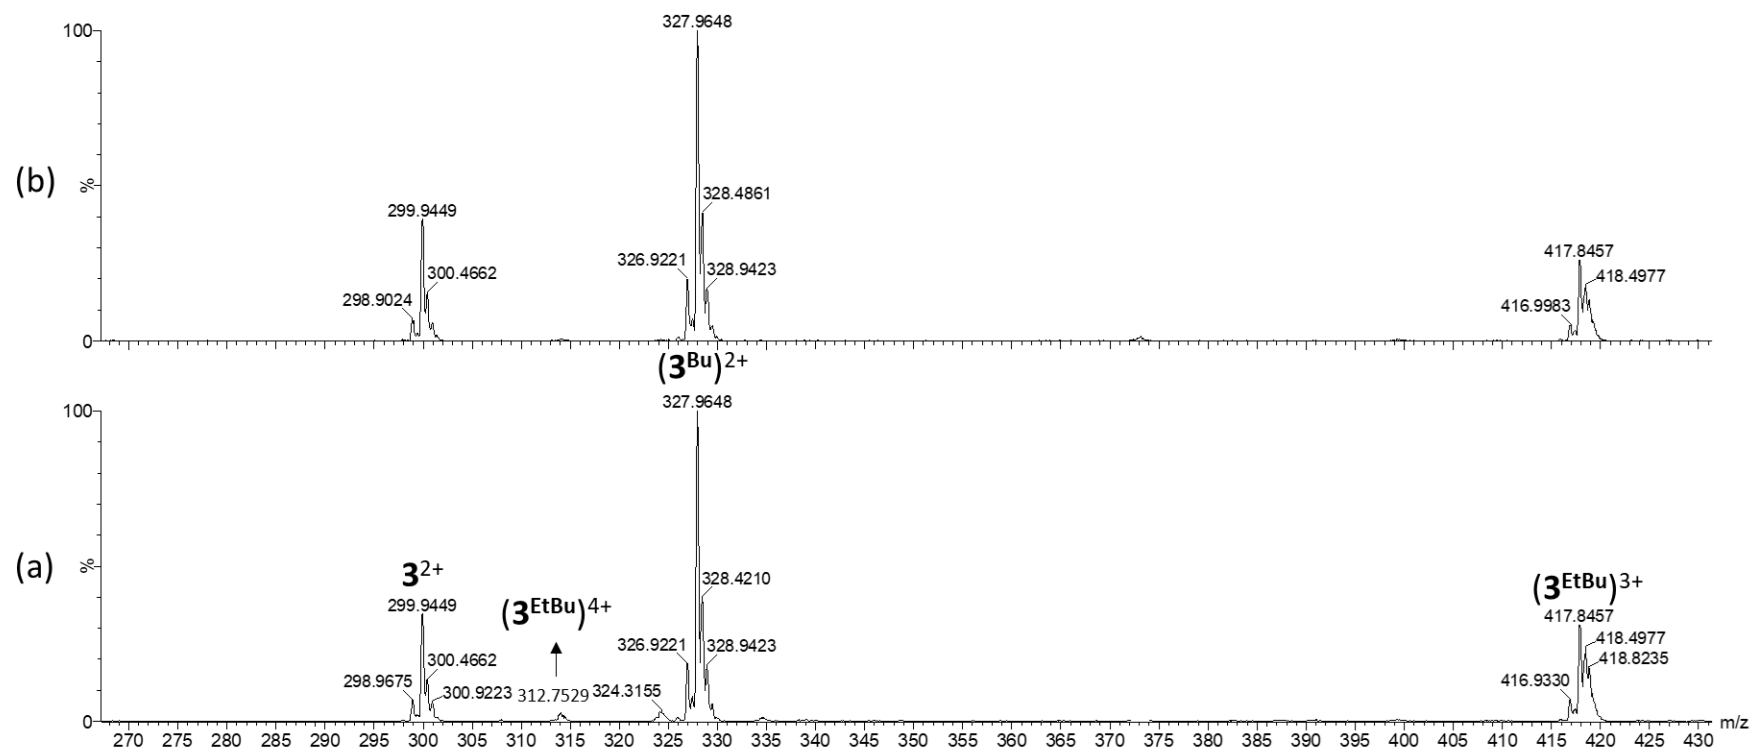

**Figure S13.** ESI-MS of the mixture  $1^{Bu}(BF_4)_2$  with fresh made  $4[BF_4]_2$  in (a) 10min and (b) 1 hr.

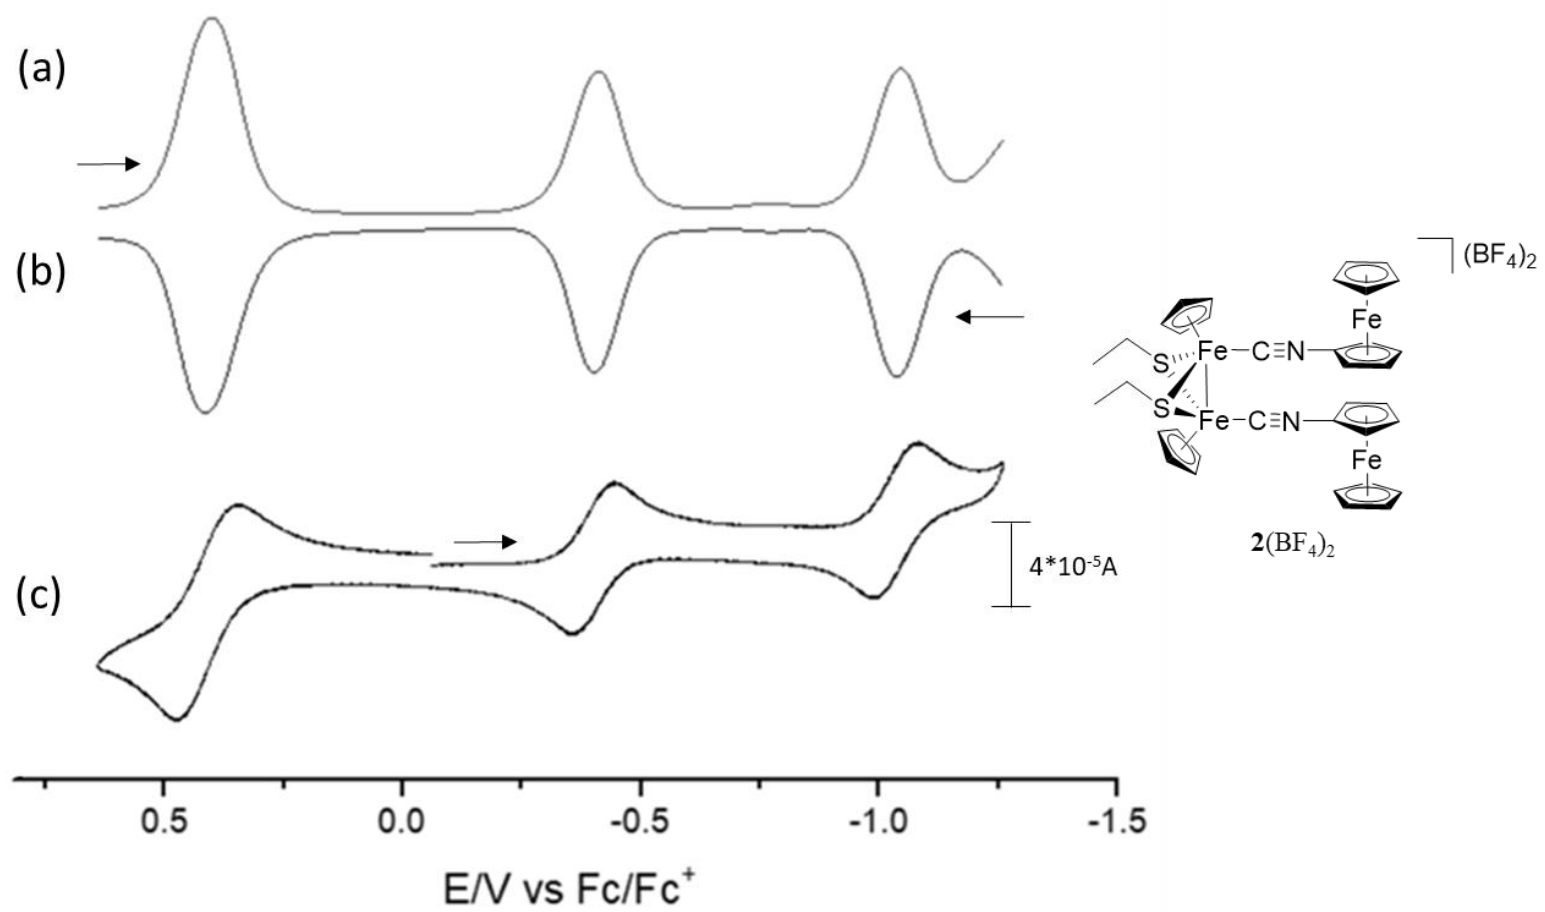

**Figure S14.** (a) Reduce wave, (b) oxidize wave of DPV and (c) CV result of  $2(\text{BF}_4)_2$  in  $\text{CH}_3\text{CN}$  ( $2 \times 10^{-4}\text{M}$ ). Scan rate =  $100\text{mVs}^{-1}$ ; working electrode = glassy carbon electrode.

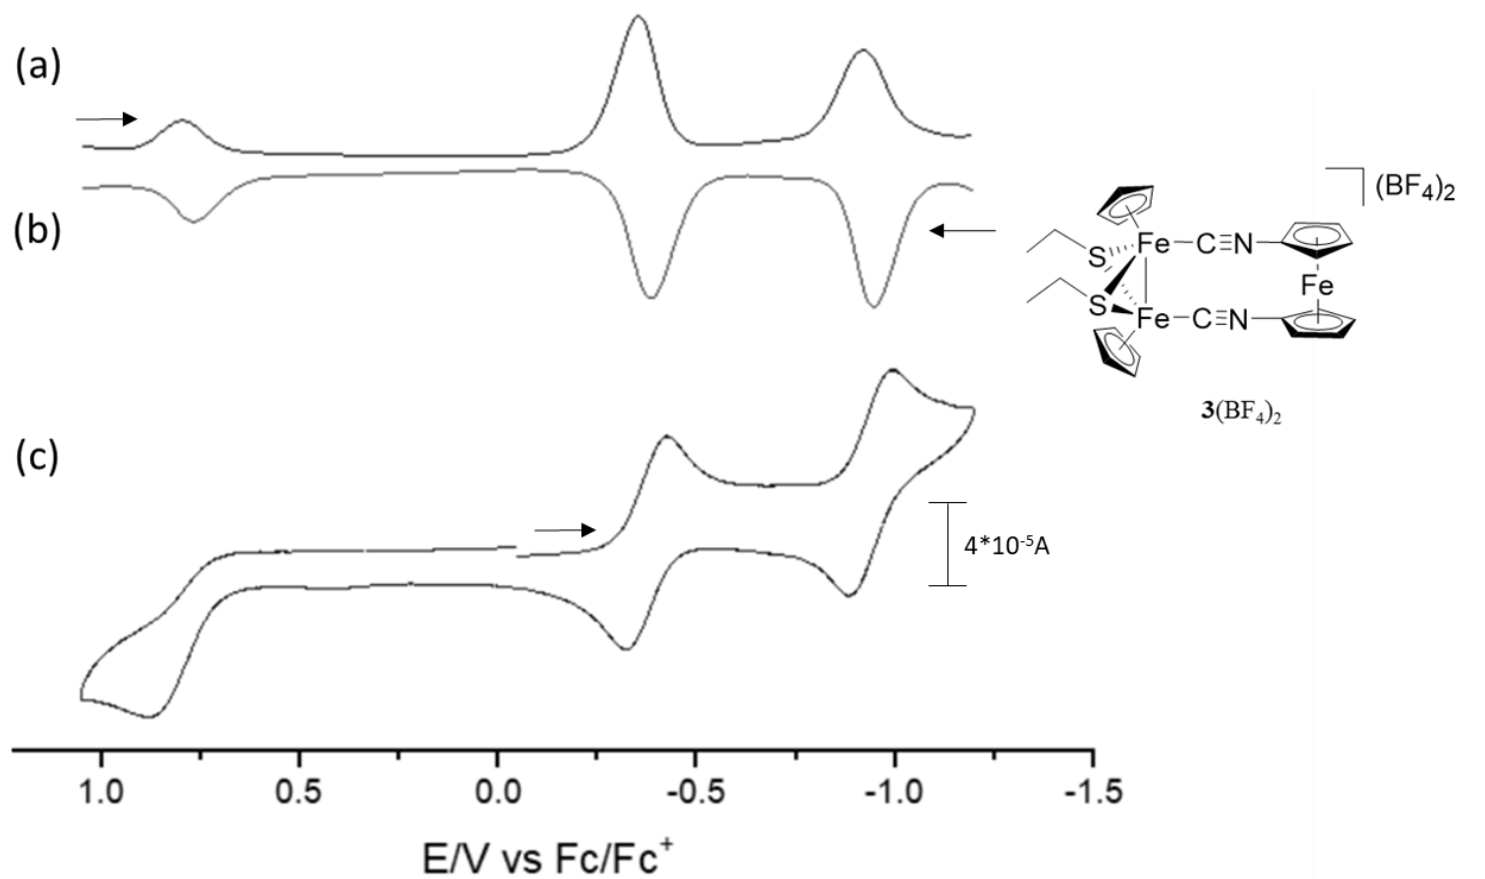

**Figure S15.** (a) Reduce wave, (b) oxidize wave of DPV and (c) CV result of  $3[\text{BF}_4]_2$  in  $\text{CH}_3\text{CN}$  ( $2 \times 10^{-4} \text{M}$ ). Scan rate =  $100 \text{mVs}^{-1}$ ; working electrode = glassy carbon electrode.



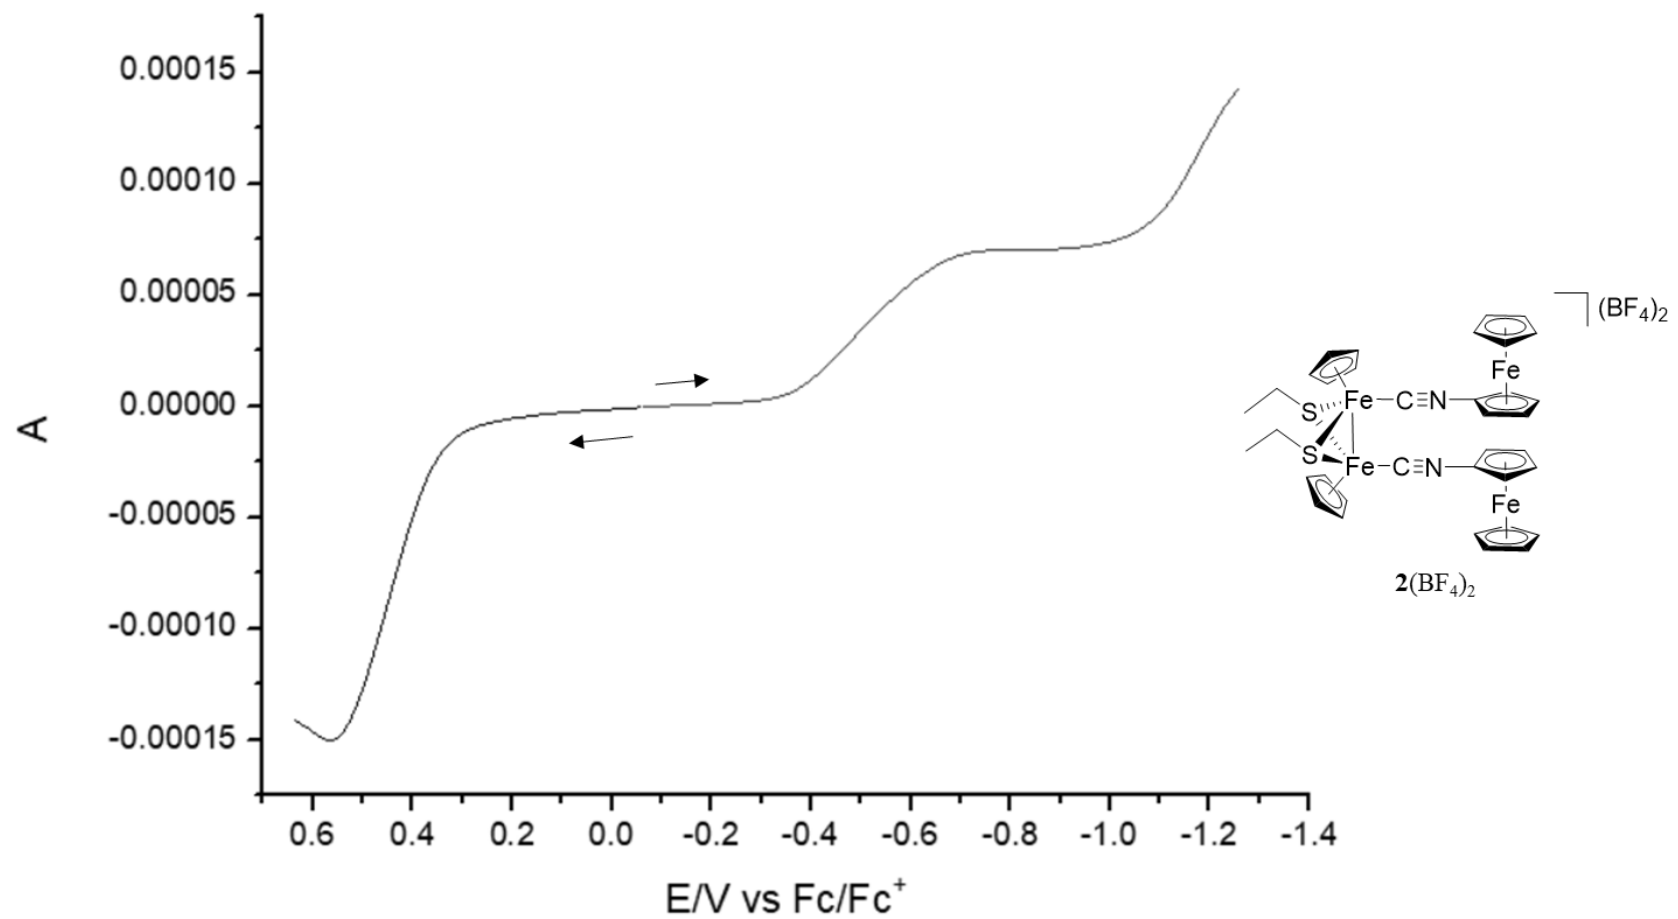

**Figure S16.** NPV result of  $2[\text{BF}_4]_2$  in  $\text{CH}_3\text{CN}$  ( $2 \times 10^{-4}\text{M}$ ); working electrode = glassy carbon electrode.

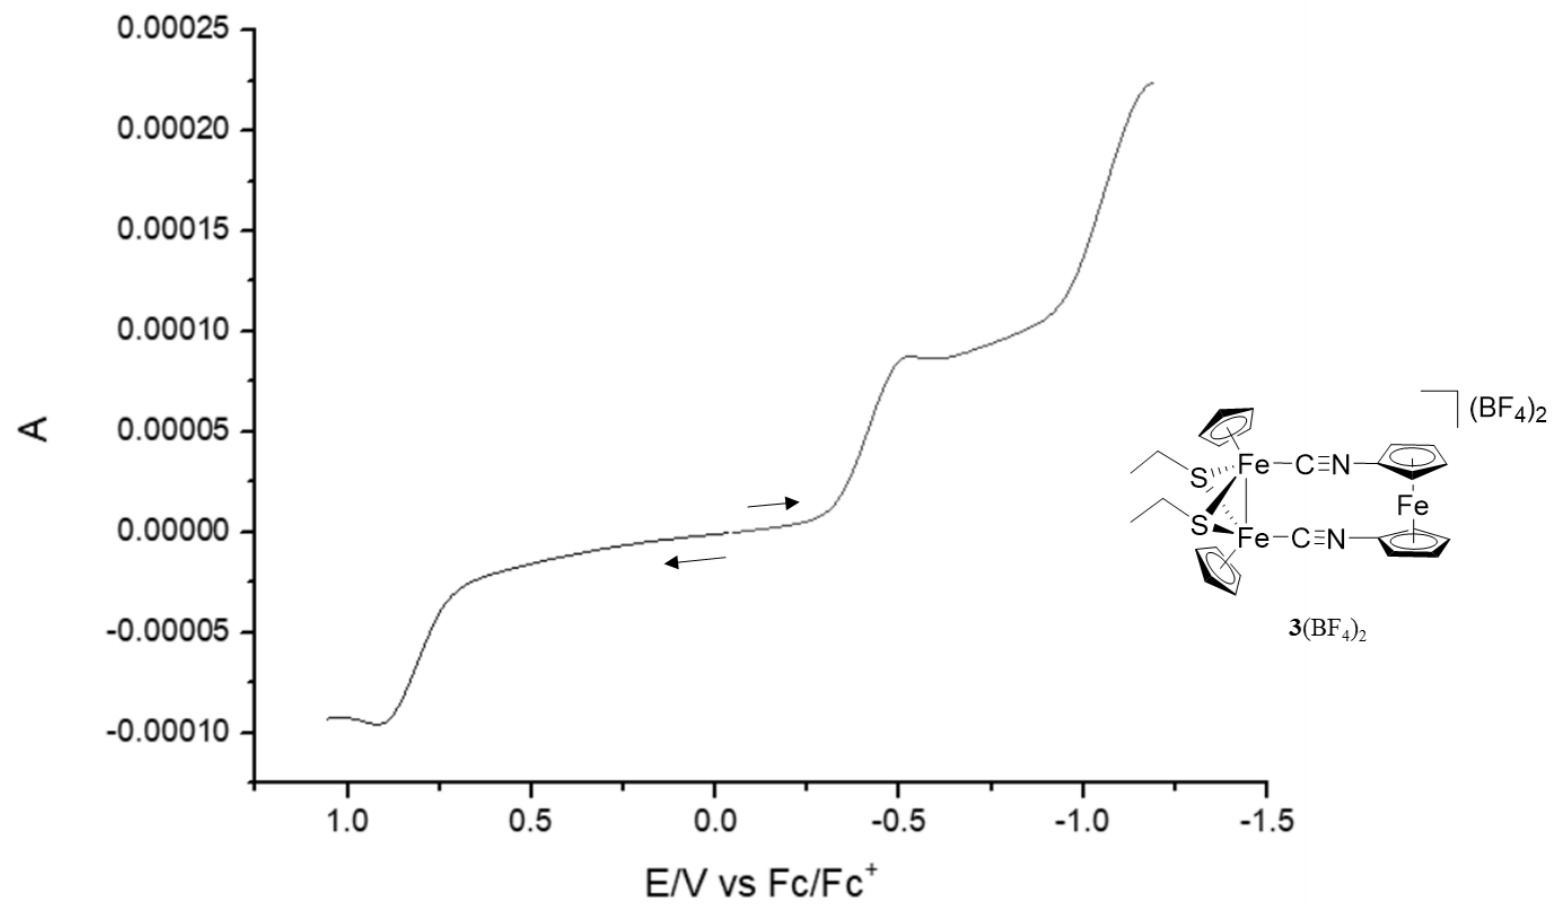

**Figure S17.** NPV result of **3**[BF<sub>4</sub>]<sub>2</sub> in CH<sub>3</sub>CN (2\*10<sup>-4</sup>M). Scan rate = 100mVs<sup>-1</sup>; working electrode = glassy carbon electrode.

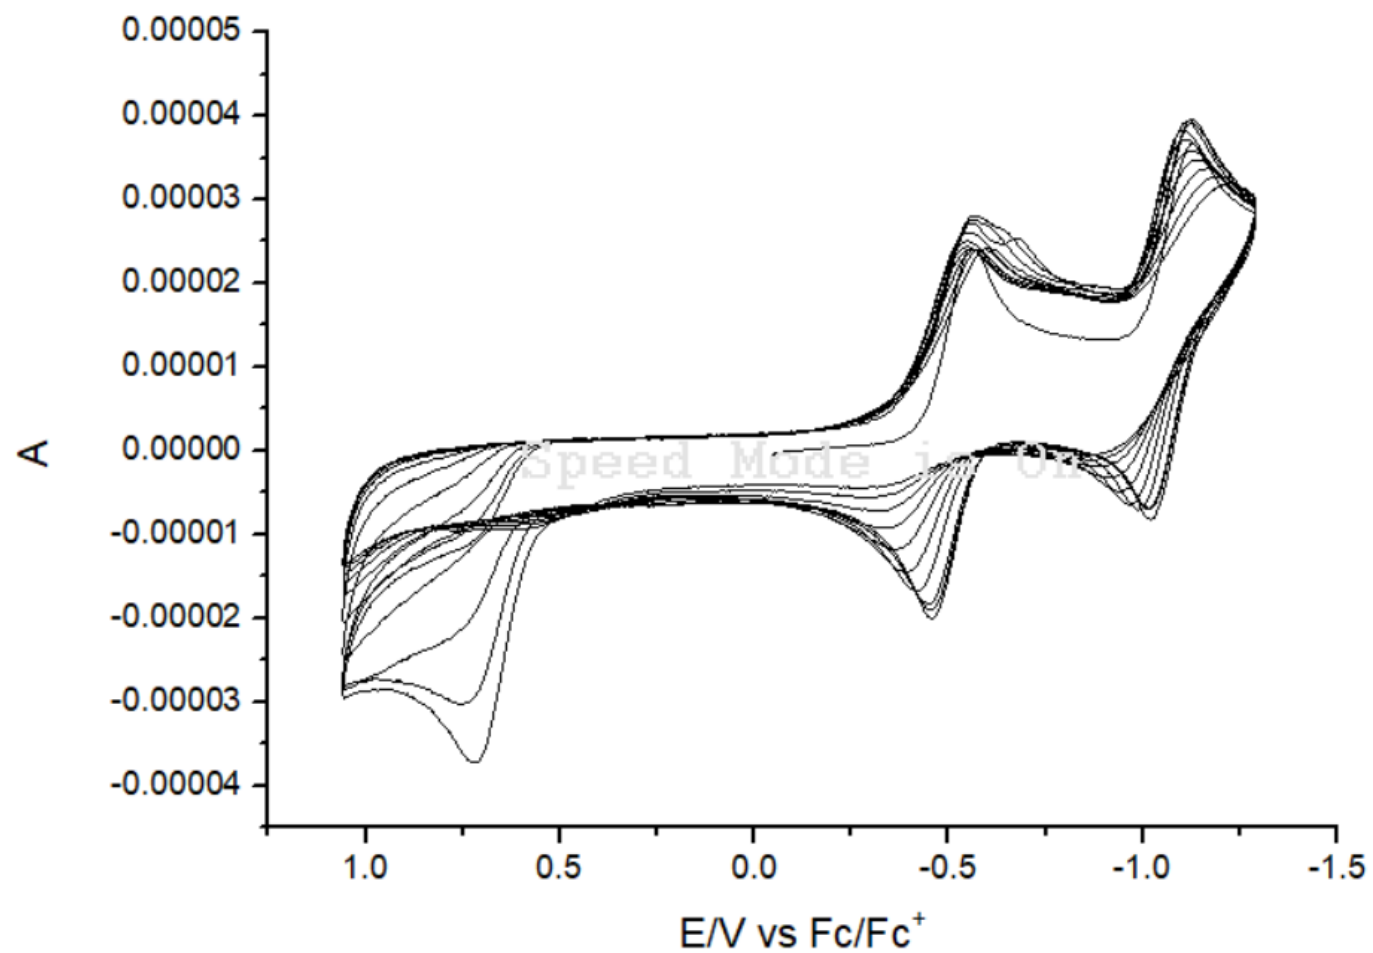

**Figure S18.** CV result (10 cycles scan) of  $3[\text{BF}_4]_2$  in  $\text{CH}_3\text{CN}$  ( $2 \times 10^{-4}\text{M}$ ). Scan rate =  $100\text{mVs}^{-1}$ ; working electrode = glassy carbon electrode.

---

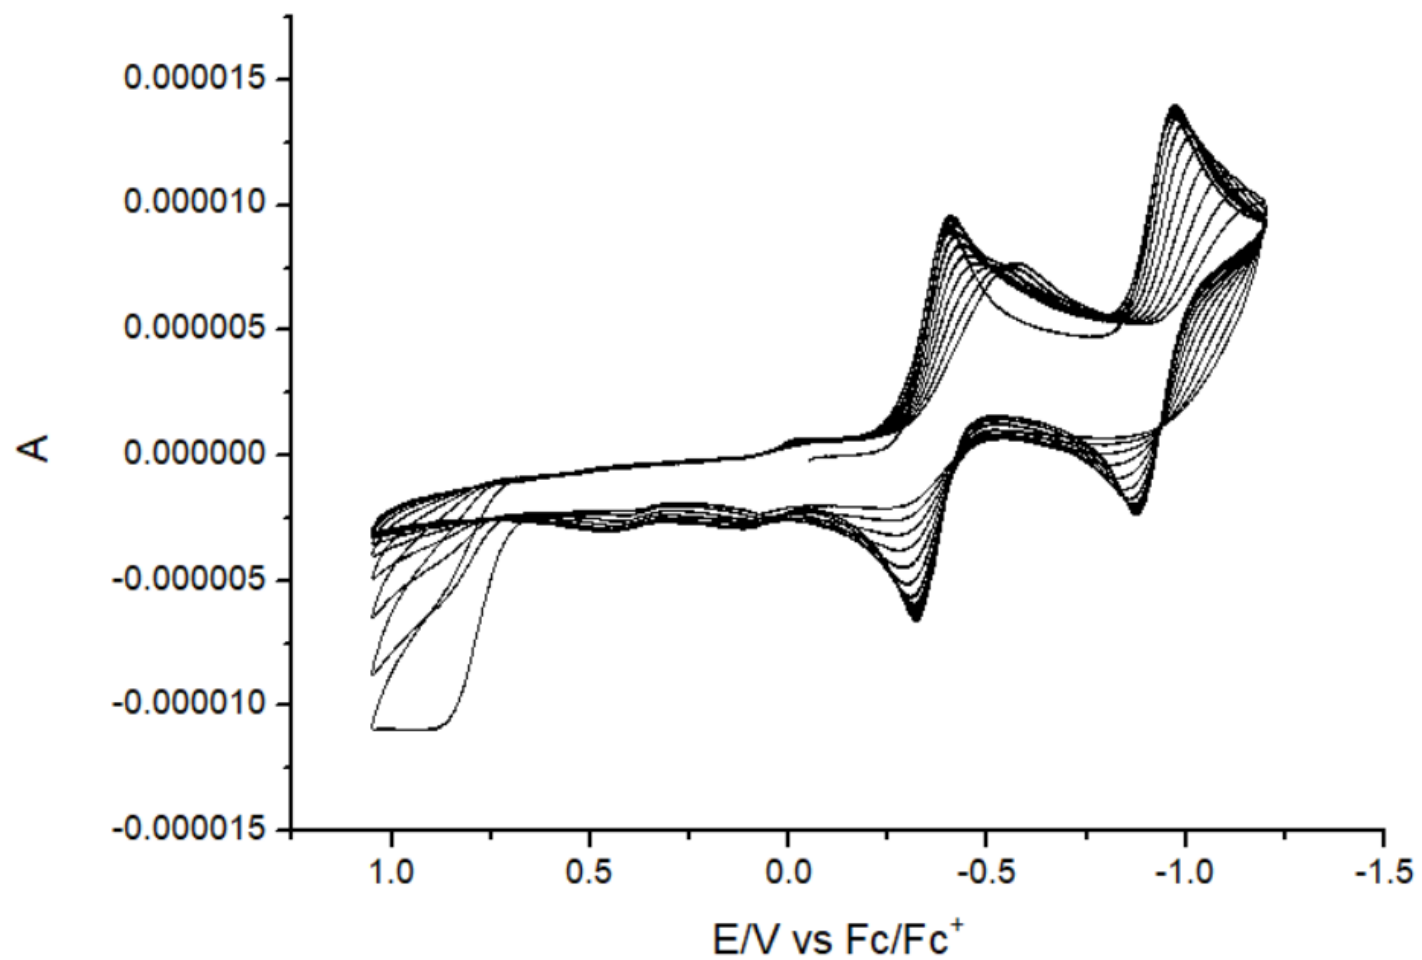

**Figure S19.** CV result (10 cycles scan) of  $3[\text{BF}_4]_2$  in  $\text{CH}_3\text{CN}$  ( $2 \times 10^{-4}\text{M}$ ). Scan rate =  $100\text{mVs}^{-1}$ ; working electrode = Pt electrode.

---

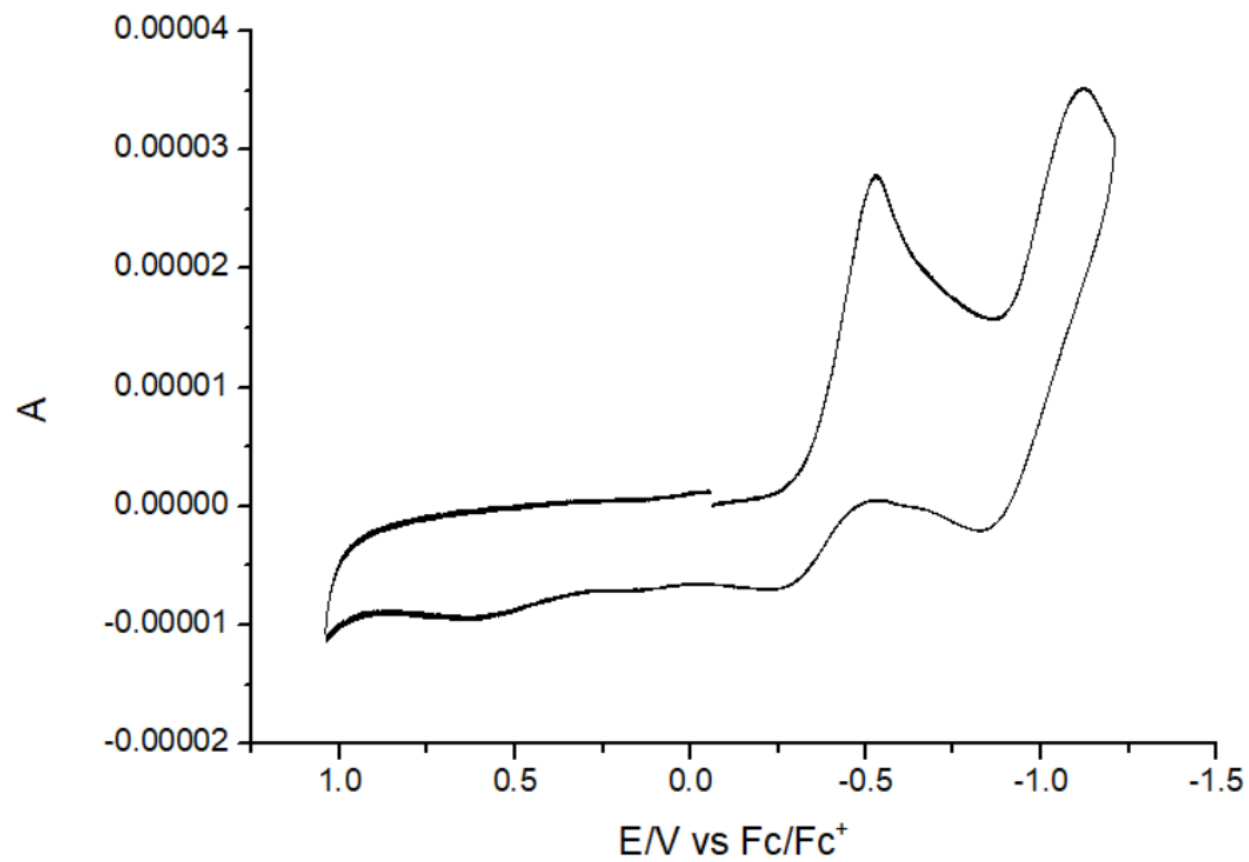

**Figure S20.** CV result of the insoluble material adsorbed on electrode surface in  $\text{CH}_3\text{CN}$ . Scan rate =  $100\text{mVs}^{-1}$ ; working electrode = glassy carbon electrode.

---

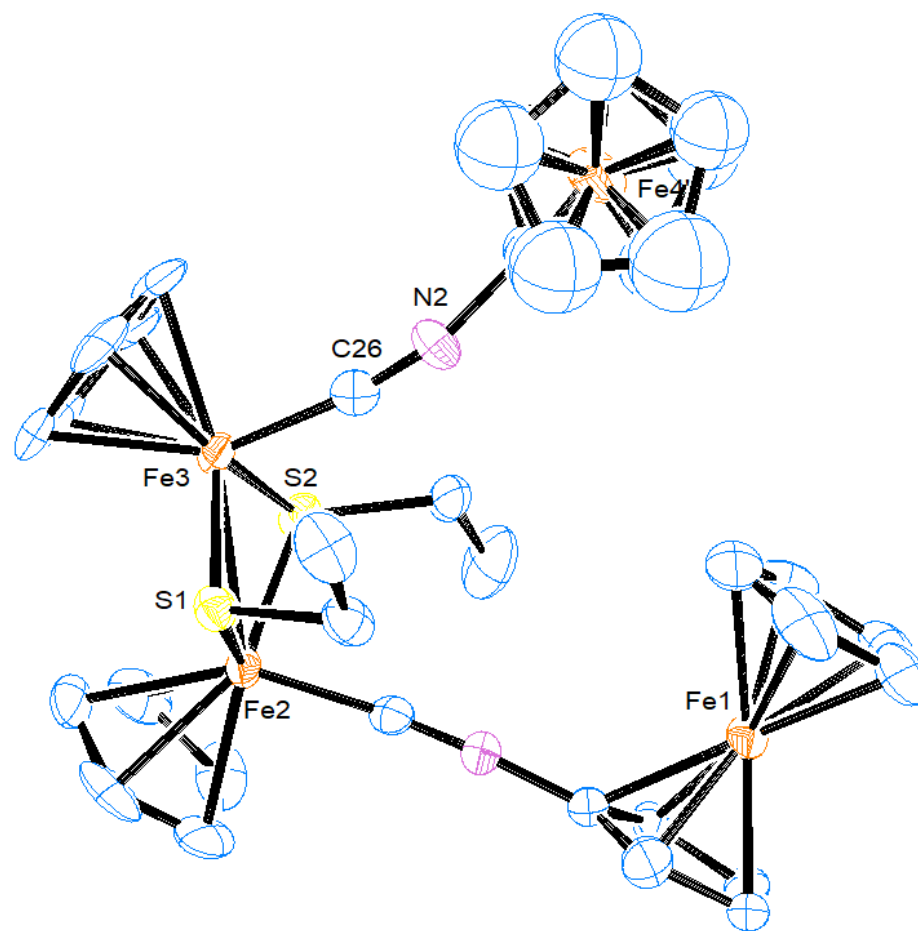

**Figure S21.** ORTEP representation of the crystal structure of the cation of  $2[\text{BF}_4]_2$  contains 40% disorder Fe4-ferrocene unit. (50% ellipsoid; all H atoms and anions are omitted for clarity).

---

**Table S1.** Selected bond lengths (Å) and angles (°) of **2**(BF<sub>4</sub>)<sub>2</sub>, **3'**(BF<sub>4</sub>)<sub>2</sub>, and related Fe<sub>2</sub>(μ-SEt)<sub>2</sub> core complexes.

| Complexes                                                                                                                                                        | Fe–Fe      | Fe–S              | Fe–CNR    | C≡Ns                                            | S–Fe–S     | Fe–S–Fe   | Ref.      |
|------------------------------------------------------------------------------------------------------------------------------------------------------------------|------------|-------------------|-----------|-------------------------------------------------|------------|-----------|-----------|
| [(CpFe) <sub>2</sub> (μ-SEt) <sub>2</sub> (CNCH <sub>3</sub> ) <sub>2</sub> ][BF <sub>4</sub> ] <sub>2</sub>                                                     | 2.6467(8)  | 2.1996(11)        | 1.867(4)  | 1.151(5)                                        | 102.49(4)  | 73.66(4)  | 15        |
|                                                                                                                                                                  |            | 2.2068(12)        | 1.855(4)  | 1.148(5)                                        | 102.80(4)  | 73.75(4)  |           |
|                                                                                                                                                                  |            | 2.2086(11)        |           |                                                 |            |           |           |
|                                                                                                                                                                  |            | 2.2110(11)        |           |                                                 |            |           |           |
| [(CpFe) <sub>2</sub> (μ-SEt) <sub>2</sub> (1,4-CNC <sub>6</sub> H <sub>4</sub> NC) <sub>2</sub> ][BF <sub>4</sub> ] <sub>2</sub>                                 | 2.633(3)   | 2.191(4) 2.19(4)  | 1.809(15) | 1.126(15) <sup>[a]</sup>                        | 105.79(17) | 73.00(14) | 16        |
|                                                                                                                                                                  |            | 2.205(4) 2.230(4) | 1.862(16) | 1.097(15) <sup>[a]</sup>                        | 104.17(17) | 73.59(13) |           |
|                                                                                                                                                                  |            |                   |           | 1.124(19) <sup>[b]</sup>                        |            |           |           |
|                                                                                                                                                                  |            |                   |           | 1.14(2) <sup>[b]</sup>                          |            |           |           |
| [(CpFe) <sub>2</sub> (μ-SEt) <sub>2</sub> (1,4-CNCH <sub>2</sub> C <sub>6</sub> H <sub>4</sub> CH <sub>2</sub> NC) <sub>2</sub> ][BF <sub>4</sub> ] <sub>2</sub> | 2.641(3)   | 2.206(3) 2.194(2) | 1.856(8)  | 1.147(8) <sup>[a]</sup> 1.157(8) <sup>[a]</sup> | 104.24(6)  | 73.65(10) | 17        |
|                                                                                                                                                                  |            | 2.201(2) 2.206(3) | 1.846(8)  | 1.147(12) <sup>[b]</sup>                        | 104.37(6)  | 73.77(10) |           |
|                                                                                                                                                                  |            |                   |           | 1.15(2) <sup>[b], [c]</sup>                     |            |           |           |
|                                                                                                                                                                  |            |                   |           | 1.24(3) <sup>[b], [c]</sup>                     |            |           |           |
| [(CpFe) <sub>2</sub> (μ-SEt) <sub>2</sub> (4,4'-CNC <sub>6</sub> H <sub>4</sub> OC <sub>6</sub> H <sub>4</sub> NC) <sub>2</sub> ][BF <sub>4</sub> ] <sub>2</sub> | 2.6390(8)  | 2.205(1) 2.205(1) | 1.856(4)  | 1.134(6) <sup>[a]</sup>                         | 104.21(5)  | 73.52(4)  | 17        |
|                                                                                                                                                                  |            | 2.208(1) 2.207(1) | 1.852(4)  | 1.144(6) <sup>[a]</sup>                         | 104.25(5)  | 73.41(4)  |           |
|                                                                                                                                                                  |            |                   |           | 1.130(8) <sup>[b]</sup>                         |            |           |           |
|                                                                                                                                                                  |            |                   |           | 1.137(8) <sup>[b]</sup>                         |            |           |           |
| <b>2</b> [BF <sub>4</sub> ] <sub>2</sub>                                                                                                                         | 2.6422(17) | 2.204(2) 2.213(3) | 1.858(9)  | 1.145(11)                                       | 103.35(9)  | 73.60(8)  | This work |
|                                                                                                                                                                  |            | 2.207(3) 2.205(3) | 1.859(10) | 1.146(12)                                       | 103.46(10) | 73.46(8)  |           |
| <b>3'</b> [BF <sub>4</sub> ] <sub>2</sub>                                                                                                                        | 2.6495(8)  | 2.2083(12)        | 1.834(4)  | 1.160(6)                                        | 105.18(4)  | 73.71(4)  | This work |
|                                                                                                                                                                  |            | 2.2090(12)        | 1.842(4)  | 1.158(5)                                        | 105.51(4)  | 73.94(4)  |           |
|                                                                                                                                                                  |            | 2.1982(12)        |           |                                                 |            |           |           |
|                                                                                                                                                                  |            | 2.2092(12)        |           |                                                 |            |           |           |
| Fc(NC) <sub>2</sub>                                                                                                                                              |            |                   |           | 1.161(19)                                       |            |           | This work |

<sup>[a]</sup> For Fe–CNR. <sup>[b]</sup> For free CNR. <sup>[c]</sup> For disorder free CNR.

**Table S2.** Crystallographic Data for Fc(NC)<sub>2</sub> and Iron-thiolate Core Complexes **2**[BF<sub>4</sub>]<sub>2</sub> and **3**[BF<sub>4</sub>]<sub>2</sub>.

|                                   | Fc(NC) <sub>2</sub>                               | <b>2</b> [BF <sub>4</sub> ] <sub>2</sub>                                                                    | <b>3</b> '[BF <sub>4</sub> ] <sub>2</sub>                                                                   |
|-----------------------------------|---------------------------------------------------|-------------------------------------------------------------------------------------------------------------|-------------------------------------------------------------------------------------------------------------|
| empirical formula                 | C <sub>12</sub> H <sub>8</sub> FeN <sub>2</sub> O | C <sub>38</sub> H <sub>41</sub> B <sub>2</sub> F <sub>8</sub> Fe <sub>4</sub> N <sub>3</sub> S <sub>2</sub> | C <sub>28</sub> H <sub>32</sub> B <sub>2</sub> F <sub>8</sub> Fe <sub>3</sub> N <sub>2</sub> S <sub>2</sub> |
| fw                                | 252.05                                            | 1000.88                                                                                                     | 801.85                                                                                                      |
| T (K)                             | 200(2)                                            | 200(2)                                                                                                      | 200(2)                                                                                                      |
| crystal size (mm <sup>3</sup> )   | 0.08 x 0.05 x 0.02                                | 0.38 x 0.26 x 0.03                                                                                          | 0.24 x 0.20 x 0.03                                                                                          |
| cryst syst                        | Monoclinic                                        | Monoclinic                                                                                                  | Monoclinic                                                                                                  |
| space group                       | C2/c                                              | P2 <sub>1</sub> /c                                                                                          | P2 <sub>1</sub> /c                                                                                          |
| a (Å)                             | 9.076(5)                                          | 22.5056(13)                                                                                                 | 10.1086(3)                                                                                                  |
| b (Å)                             | 8.347(4)                                          | 9.8715(4)                                                                                                   | 10.8254(3)                                                                                                  |
| c (Å)                             | 13.309(9)                                         | 20.6103(9)                                                                                                  | 28.7588(7)                                                                                                  |
| α (deg)                           | 90                                                | 90                                                                                                          | 90                                                                                                          |
| β (deg)                           | 108.19(2)                                         | 116.551(2)                                                                                                  | 94.8810(10)                                                                                                 |
| γ (deg)                           | 90                                                | 90                                                                                                          | 90                                                                                                          |
| V (Å <sup>3</sup> )               | 957.8(9)                                          | 4096.0(3)                                                                                                   | 3135.65(15)                                                                                                 |
| Z                                 | 4                                                 | 4                                                                                                           | 4                                                                                                           |
| Dcalcd (g cm <sup>-3</sup> )      | 1.762                                             | 1.623                                                                                                       | 1.699                                                                                                       |
| μ (mm <sup>-1</sup> )             | 1.548                                             | 1.560                                                                                                       | 1.574                                                                                                       |
| reflns measd/indep                | 3616 / 843                                        | 27606 / 7280                                                                                                | 50107 / 5535                                                                                                |
| data/restraints/params            | 843 / 7 / 97                                      | 7280 / 6 / 477                                                                                              | 5535 / 0 / 394                                                                                              |
| GOF                               | 1.172                                             | 1.070                                                                                                       | 1.019                                                                                                       |
| Rint                              | 0.0723                                            | 0.0728                                                                                                      | 0.0384                                                                                                      |
| R1 [I > 2σ] (all data)            | 0.0773 (0.2046)                                   | 0.0978 (0.214)                                                                                              | 0.0490 (0.1222)                                                                                             |
| wR2 [I > 2σ] (all data)           | 0.1013 (0.2250)                                   | 0.1518 (0.2472)                                                                                             | 0.0581 (0.1312)                                                                                             |
| max peak/hole (e/Å <sup>3</sup> ) | 0.574 / -1.101                                    | 1.632 / -2.065                                                                                              | 1.769 / -1.584                                                                                              |

**Note:** The B-level alert message for the somewhat low C-C bond precision in **2**[BF<sub>4</sub>]<sub>2</sub> resulted from the weak diffraction data (less than half of the data with I>2σ(I)). This is the disorder nature of terminal ferrocene groups in the sample crystal. The current result is the best we can get.
